# Supplementary material for: Iron oxides with a reverse spinel structure: impact of active sites on molecule adsorption
Source: Royal Society of Chemistry journal article supplement (doi:10.1039/c9qi00790c), 2019-01-01
Supplement: c9qi00790c3.pdf [file c9qi00790c3.pdf]

## Supplementary Information

### Iron oxides with reverse spinel structure : impact of active sites on molecules adsorption

Wei Jian,Ran Jia,Jian Wang,Hong-Xing Zhang\* and Fu-Quan Bai,\*

*Laboratory of Theoretical and Computational Chemistry,*

*Institute of Theoretical Chemistry and College of Chemistry,*

*Jilin University, 130023, Changchun, People's Republic of China.*

The surface energy of all the structures is considering as follows formula:[1]

$$\gamma = \frac{1}{2A} [E^{slab} - n_{Fe} \mu_{Fe}^{slab} + n_O \mu_O^{slab}] \quad (S1)$$

where A is the surface area, slab represents the (111) surface or (001) surface,  $E^{slab}$  is the total energy of the relative relaxed surface structure, n is the number of atoms in the supercell, and  $\mu$  is the chemical potential. The factor of 1/2 represents two identical surfaces in the slab models. The chemical potential  $\mu_{Fe}^{slab}$  of  $Fe_3O_4$  and  $\gamma\text{-}Fe_2O_3$  are written as a sum of the chemical potential of each species within the crystal:[2]

$$\mu_{Fe_3O_4}^{slab} = 24\mu_{Fe}^{slab} + 32\mu_O^{slab} \quad (S2)$$

$$\mu_{\gamma\text{-}Fe_2O_3}^{slab} = 21.34\mu_{Fe}^{slab} + 32\mu_O^{slab} \quad (S3)$$

At 0 K and constant pressure, the chemical potential of the surface is in equilibrium with the chemical potential of bulk to give  $\mu_{Fe_3O_4}^{slab} = \mu_{Fe_3O_4}^{bulk}$  and  $\mu_{\gamma\text{-}Fe_2O_3}^{slab} = \mu_{\gamma\text{-}Fe_2O_3}^{bulk}$ . Thus, the surface energy can be expressed as:

$$\gamma_{Fe_3O_4} = \frac{1}{2A} [E_{Fe_3O_4}^{slab} - n_{bulk} E_{Fe_3O_4}^{bulk} + n_O \mu_O^{slab}] \quad (S4)$$

$$\gamma_{\gamma\text{-}Fe_2O_3} = \frac{1}{2A} [E_{\gamma\text{-}Fe_2O_3}^{slab} - n_{bulk} E_{\gamma\text{-}Fe_2O_3}^{bulk} + n_O \mu_O^{slab}] \quad (S5)$$

where  $n_O$  represent the number of excessive oxygen beyond  $Fe_3O_4$  and  $\gamma\text{-}Fe_2O_3$  units in the slab.

The chemical potential of oxygen in the slab must be less than the chemical potential of oxygen in its bulk phases or the composite slab will be unstable and form the more favorable bulk phase energetically. Therefore, the thermodynamic range of the O chemical potential is:[3]

$$\mu_O^{mol} + \frac{1}{2} \Delta H_f^0 \leq \mu_O^{slab} \leq \mu_O^{mol} \quad (S6)$$

$$\frac{1}{2}\Delta H_f^0 \leq \mu_O \leq 0 \quad (\text{S7})$$

Here,  $\Delta H_f^0$  is the heat of formation contained in the bulk energy, which is composed of the energy of the metal phase Fe atom ( $E_{Fe}^{met}$ ) and molecular  $O_2$  ( $E_{O_2}^{mol}$ ):

$$E_{Fe_3O_4}^{bulk} = 24E_{Fe}^{met} + 32\frac{1}{2}E_{O_2}^{mol} + \Delta H_f^0(Fe_3O_4) \quad (\text{S8})$$

$$E_{\gamma-Fe_2O_3}^{bulk} = 24E_{Fe}^{met} + 32\frac{1}{2}E_{O_2}^{mol} + \Delta H_f^0(\gamma-Fe_2O_3) \quad (\text{S9})$$

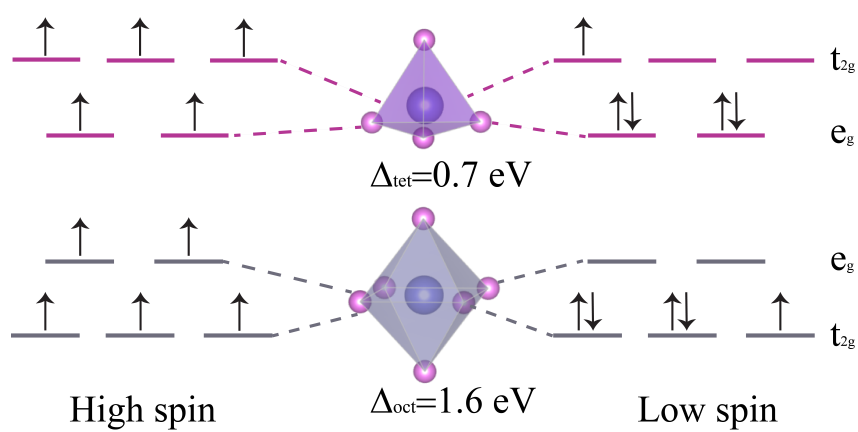

**Fig. S1**  $\text{Fe}^{3+}$  electron configurations in tetrahedral and octahedral sites based on crystal-field theory.

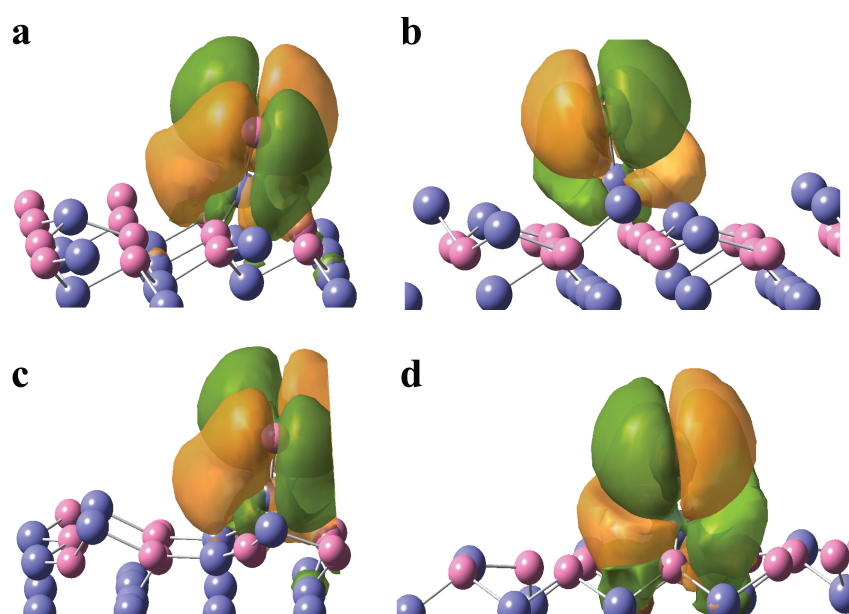

**Fig. S2** NBOs for O-O  $\pi^*$  on (111) surface of (a)Fe<sub>3</sub>O<sub>4</sub>-tet (b)Fe<sub>3</sub>O<sub>4</sub>-oct (c)  $\gamma$ -Fe<sub>2</sub>O<sub>3</sub>-tet and (d)  $\gamma$ -Fe<sub>2</sub>O<sub>3</sub>-oct. For the sake of clarity, the symmetric parts of the bottom optimized slabs were not shown.

| compound                                      | NBO                          | occupancy | center(bond<br>% contribution) | hybridization<br>(function,%) |
|-----------------------------------------------|------------------------------|-----------|--------------------------------|-------------------------------|
| Fe <sub>3</sub> O <sub>4</sub> -tet           | Fe-O <sub>4</sub> $\sigma$   | 1.880     | Fe (26)<br>O <sub>4</sub> (74) | s 19, p 16, d 65<br>s 5, p 95 |
|                                               | Fe-O <sub>4</sub> $\sigma^*$ | 0.239     | Fe (74)<br>O <sub>4</sub> (26) | s 19, p 16, d 65<br>s 5, p 95 |
|                                               | Fe-O <sub>5</sub> $\sigma$   | 1.886     | Fe (27)<br>O <sub>5</sub> (73) | s 10, p 12, d 78<br>s 8, p 92 |
|                                               | Fe-O <sub>5</sub> $\sigma^*$ | 0.358     | Fe (74)<br>O <sub>5</sub> (26) | s 10, p 12, d 78<br>s 8, p 92 |
| Fe <sub>3</sub> O <sub>4</sub> -oct           | Fe-O <sub>4</sub> $\sigma$   | 1.920     | Fe (25)<br>O <sub>4</sub> (75) | s 23, p 16, d 61<br>s 9, p 91 |
|                                               | Fe-O <sub>4</sub> $\sigma^*$ | 0.236     | Fe (73)<br>O <sub>4</sub> (27) | s 23, p 16, d 61<br>s 9, p 91 |
|                                               | Fe-O <sub>5</sub> $\sigma$   | 1.920     | Fe (25)<br>O <sub>5</sub> (75) | s 23, p 16, d 61<br>s 9, p 91 |
|                                               | Fe-O <sub>5</sub> $\sigma^*$ | 0.236     | Fe (75)<br>O <sub>5</sub> (25) | s 23, p 16, d 61<br>s 9, p 91 |
| $\gamma$ -Fe <sub>2</sub> O <sub>3</sub> -tet | Fe-O <sub>4</sub> $\sigma$   | 1.924     | Fe (30)<br>O <sub>4</sub> (70) | s 10, p 9, d 81<br>s 6, p 94  |
|                                               | Fe-O <sub>4</sub> $\sigma^*$ | 0.243     | Fe (75)<br>O <sub>4</sub> (25) | s 10, p 9, d 81<br>s 6, p 94  |
|                                               | Fe-O <sub>5</sub> $\sigma$   | 1.923     | Fe (25)<br>O <sub>5</sub> (75) | s 10, p 9, d 81<br>s 6, p 94  |
|                                               | Fe-O <sub>5</sub> $\sigma^*$ | 0.240     | Fe (75)<br>O <sub>5</sub> (25) | s 10, p 9, d 81<br>s 6, p 94  |
| $\gamma$ -Fe <sub>2</sub> O <sub>3</sub> -oct | Fe-O <sub>4</sub> $\sigma$   | 1.910     | Fe (26)<br>O <sub>4</sub> (74) | s 21, p 15, d 64<br>s 8, p 92 |
|                                               | Fe-O <sub>4</sub> $\sigma^*$ | 0.261     | Fe (74)<br>O <sub>4</sub> (26) | s 21, p 15, d 64<br>s 8, p 92 |
|                                               | Fe-O <sub>5</sub> $\sigma$   | 1.911     | Fe (26)<br>O <sub>5</sub> (74) | s 21, p 15, d 64<br>s 8, p 92 |
|                                               | Fe-O <sub>5</sub> $\sigma^*$ | 0.253     | Fe (74)<br>O <sub>5</sub> (26) | s 21, p 15, d 64<br>s 8, p 92 |

**Table. S1** NBOs for O<sub>2</sub> adsorption on (111) surface of catalysts

## References

- [1] K. Zhao, L. Zhang, J. Wang, Q. Li, W. He and J. J. Yin, *Journal of the American Chemical Society*, 2013, **135**, 15750–15753.
- [2] Q. Li and X. Hu, *Physical Review B*, 2006, **74**, 035414.
- [3] G. Chen, Z. Hou and X. Gong, *Computational Materials Science*, 2008, **44**, 46–52.
