# Supplementary figures and images for: Iron oxides with a reverse spinel structure: impact of active sites on molecule adsorption
Source: Royal Society of Chemistry journal article supplement (doi:10.1039/c9qi00790c), 2019-01-01

**a**

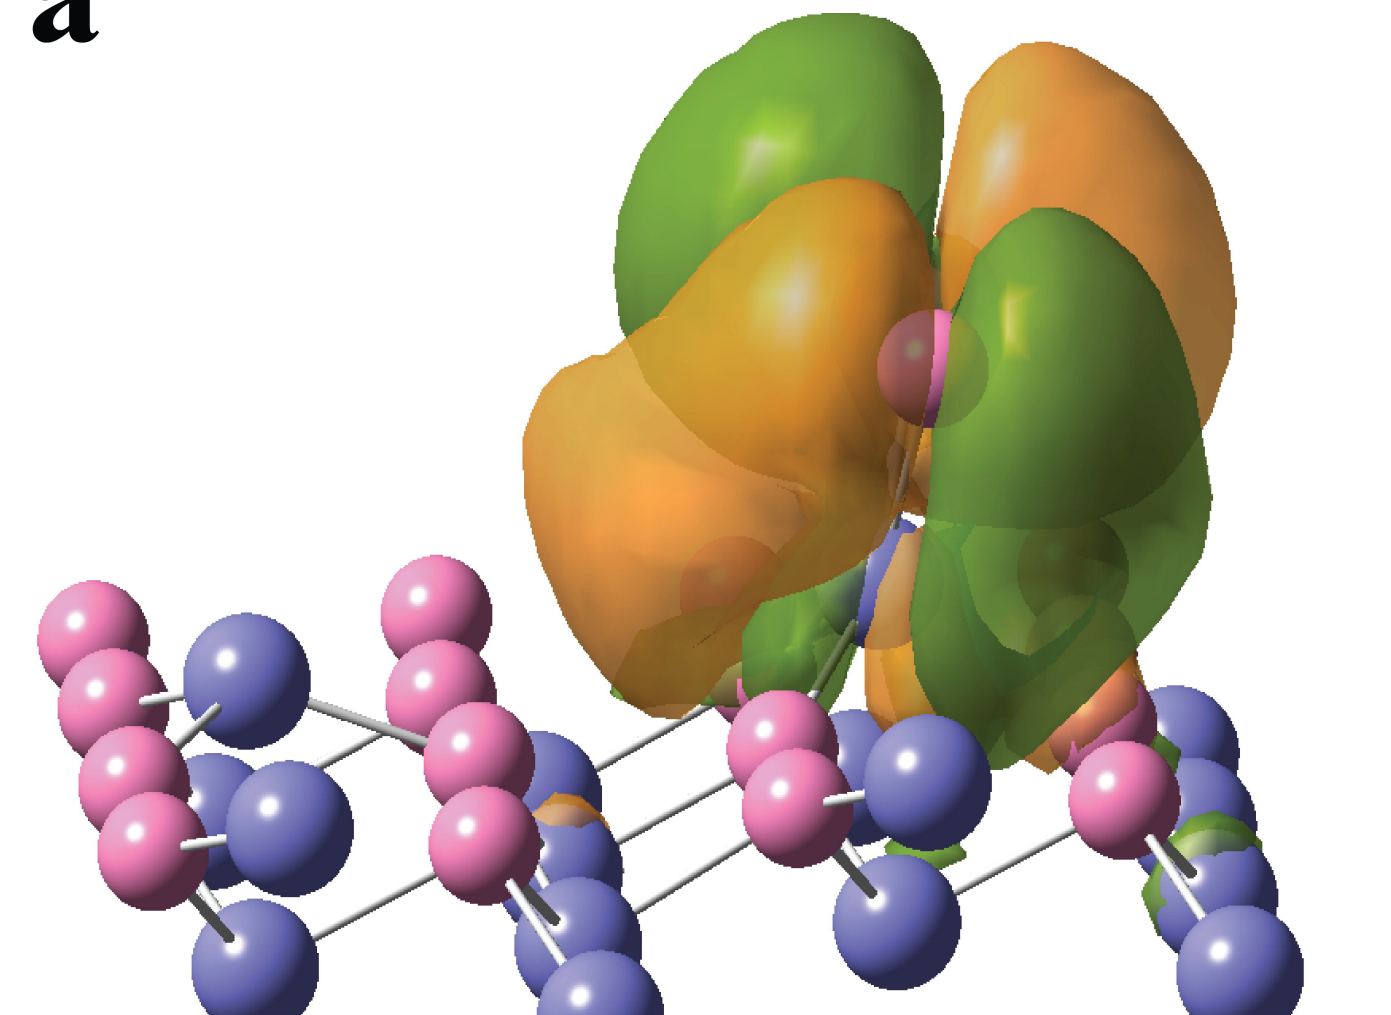

**b**

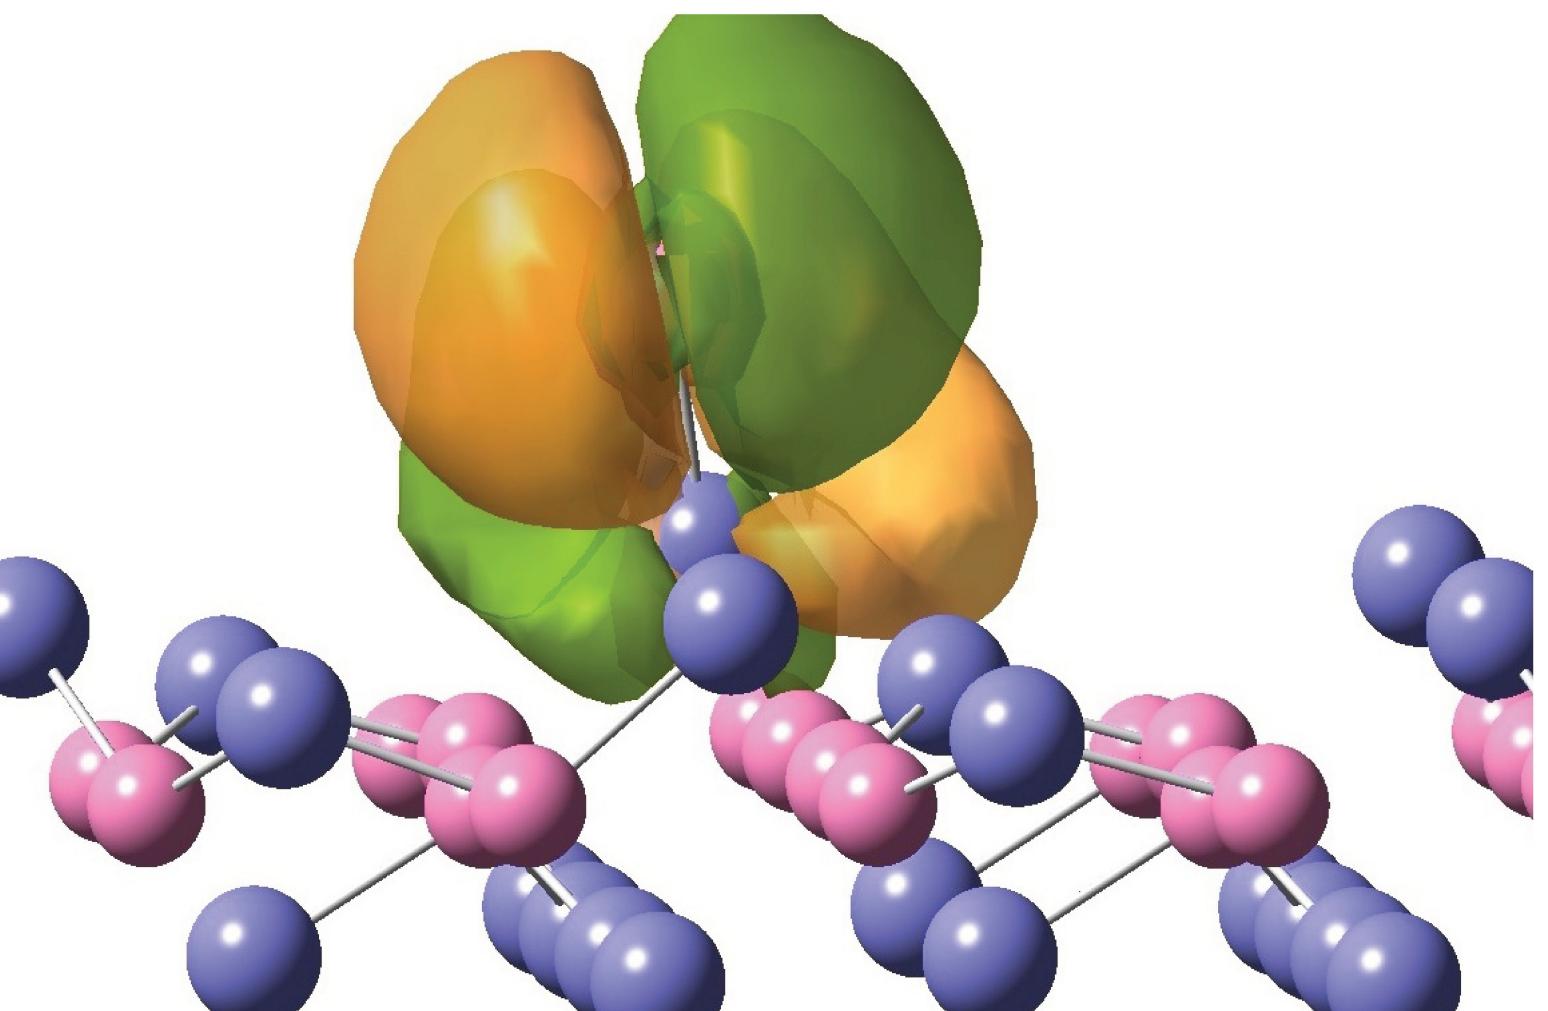

**c**

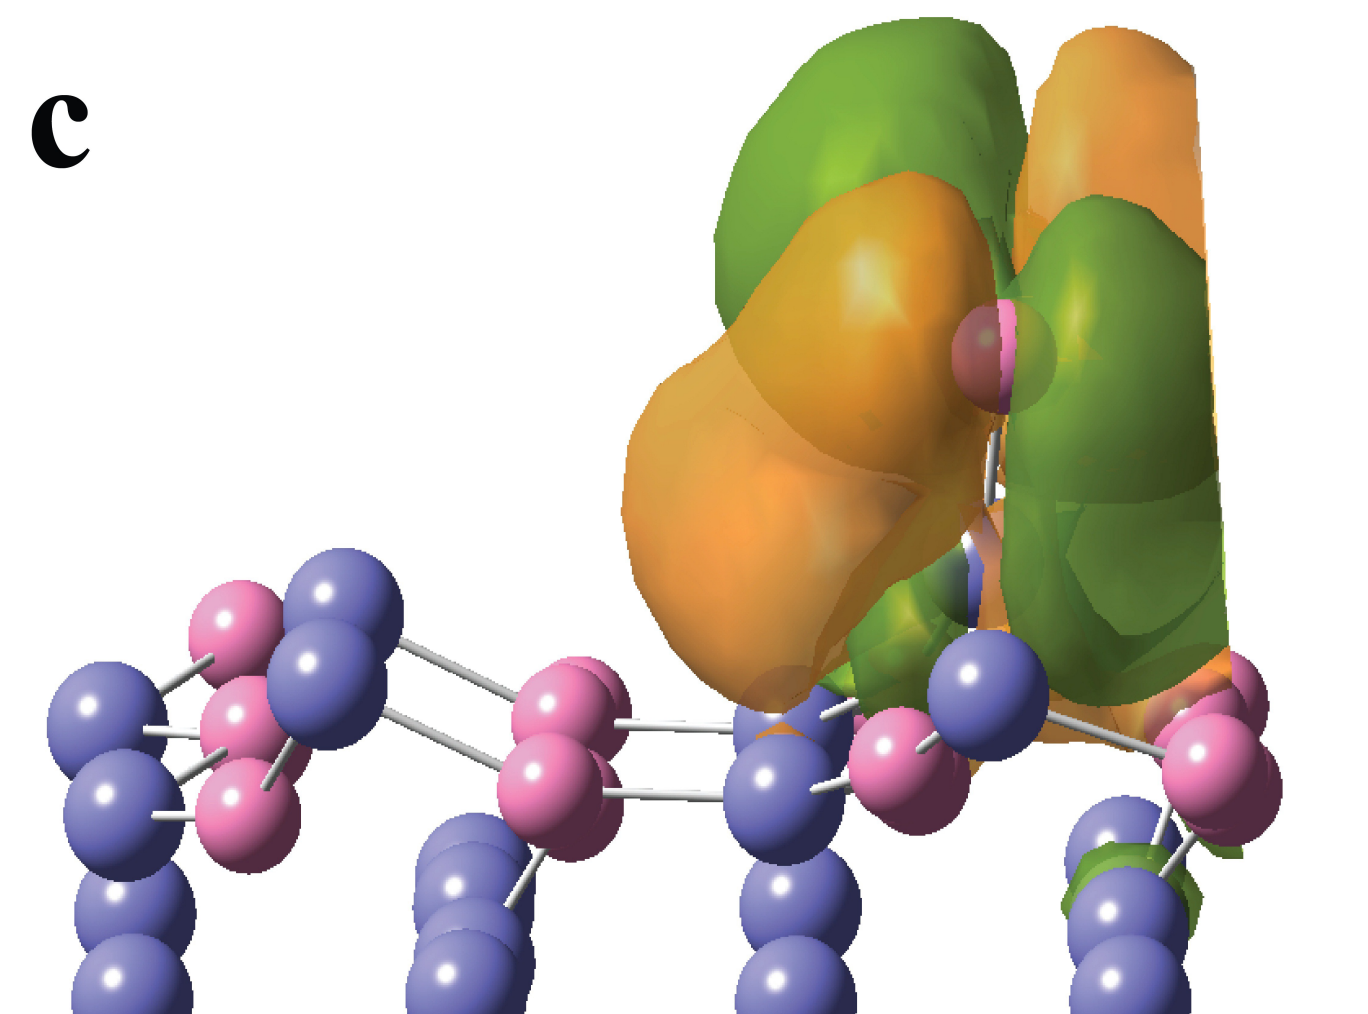

**d**

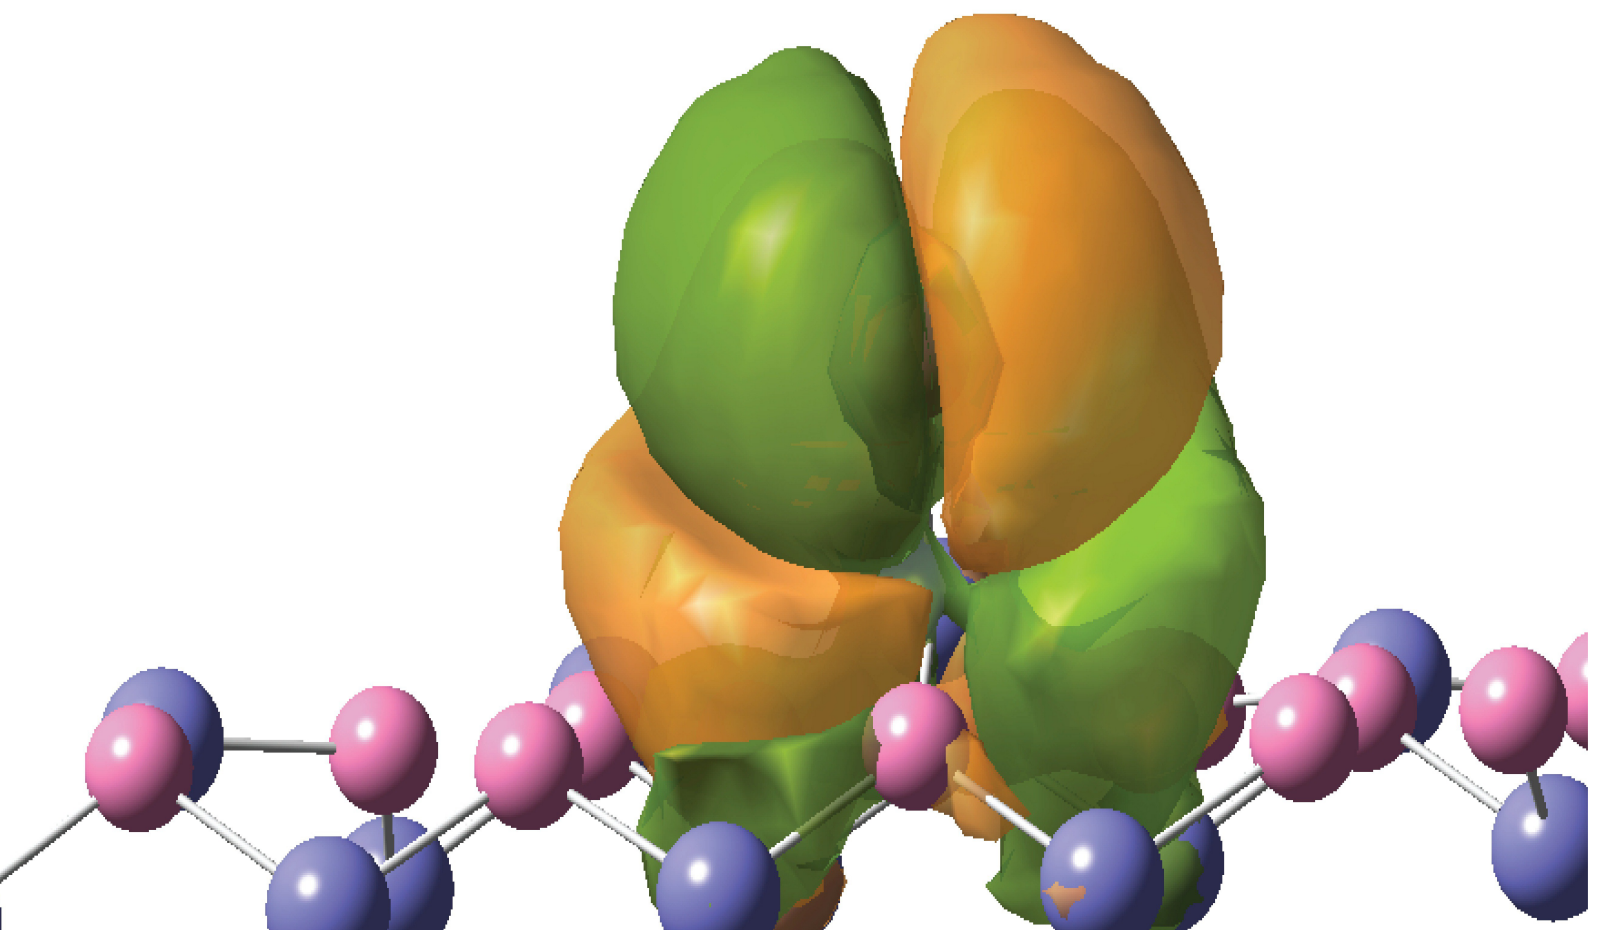

Supplement: c9qi00790c1.pdf [file c9qi00790c1.pdf]

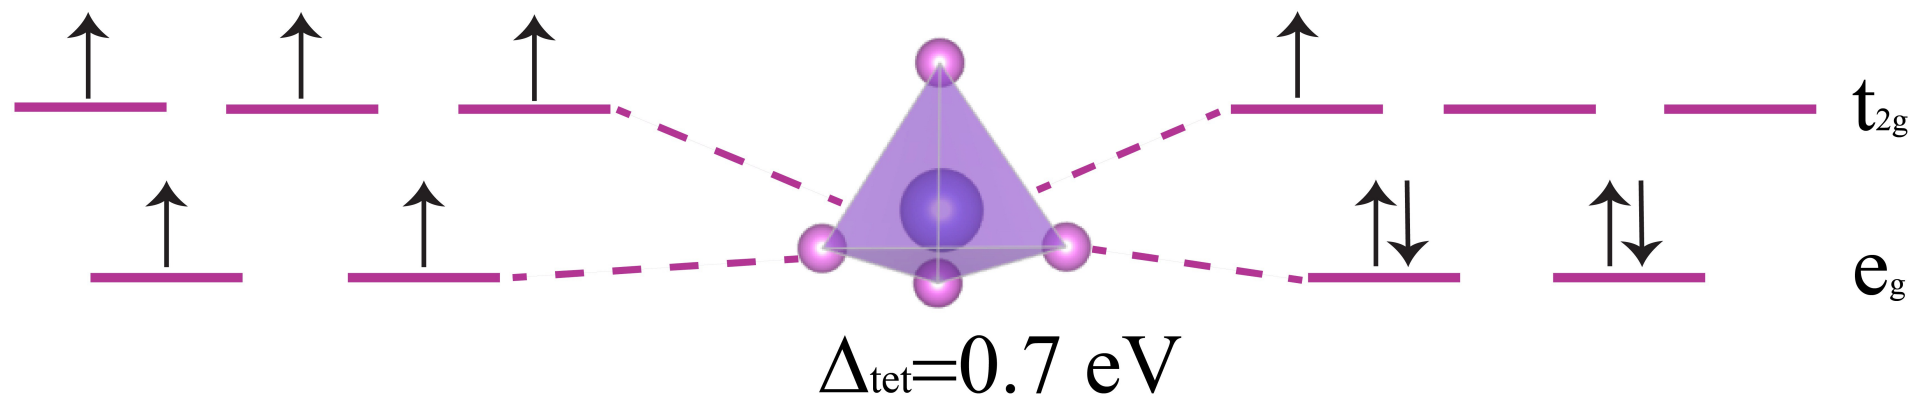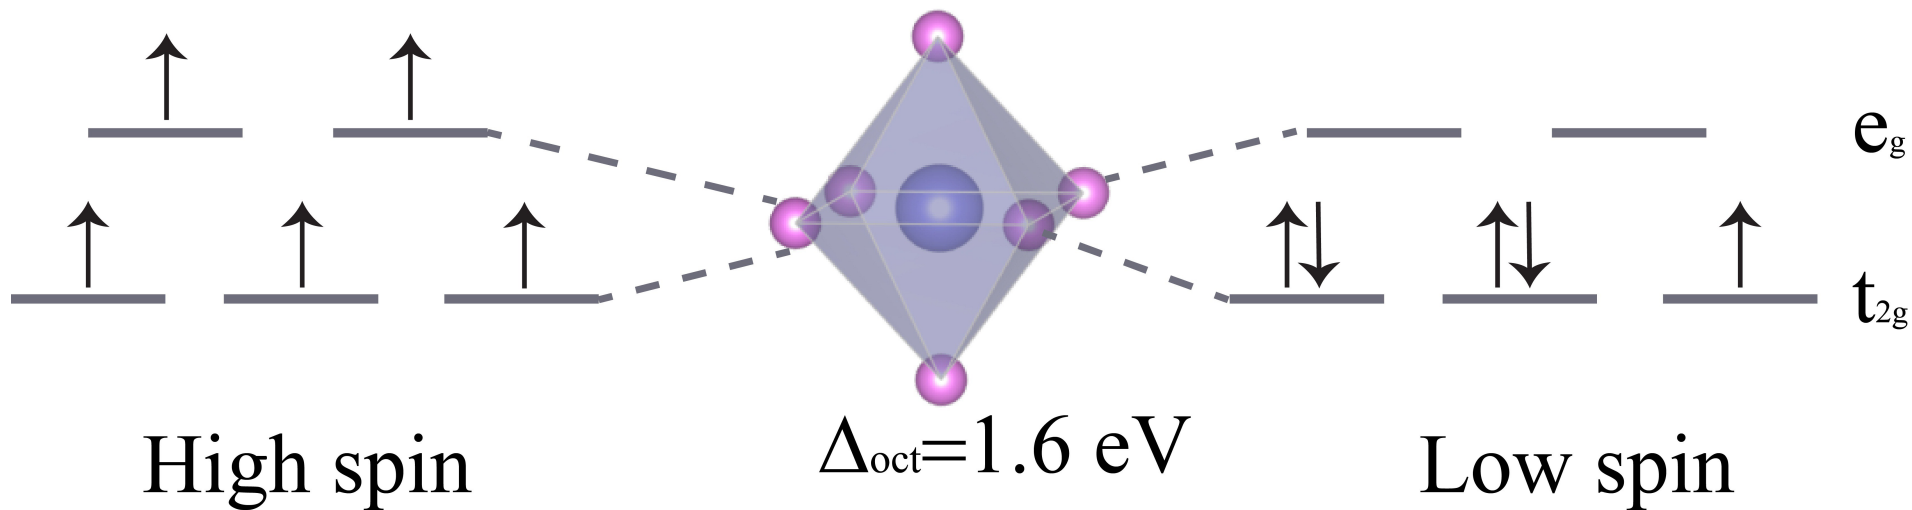

Supplement: c9qi00790c2.pdf [file c9qi00790c2.pdf]
